# Supplementary material
Source: PubMed Central journal article supplement (PMC5440799)
Supplement: sb6b00230_si_001.pdf [file sb6b00230_si_001.pdf]

## Supporting Information

### Refactoring the Embden-Meyerhof-Parnas pathway as a whole of portable GlucoBricks for implantation of glycolytic modules in Gram-negative bacteria

by

Alberto Sánchez-Pascuala, Víctor de Lorenzo, and Pablo I. Nikel

#### SUPPLEMENTARY METHODS

**Construction of mutant bacterial strains.** Bacterial strains used in this study are listed in *Table S1*. A  $\Delta glk$  derivative of *Pseudomonas putida* KT2440 was constructed by using the procedure described by Martínez-García and de Lorenzo<sup>1</sup>, using the suicide pEMG vector (*Table S2*). Suitable oligonucleotides (*PP\_1011-TS1F* and *PP\_1011-TS1R*, and *PP\_1011-TS2F* and *PP\_1011-TS2R*, *Table S3*) were employed to amplify ca. 500-bp long flanking regions upstream and downstream of *glk* (*PP\_1011*) by PCR using chromosomal DNA from strain KT2440 as the template. A 1-kbp amplification product (i.e., spanning the TS1-TS2 regions flanking *glk*) was obtained using the two 500-bp amplicons mentioned above as the template and the external oligonucleotides (i.e., *PP\_1011-TS1F* and *PP\_1011-TS2R*) by splicing-by-overlap extension (SOEing) PCR<sup>2,3</sup>. The TS1-TS2 DNA fragment was digested with *EcoRI* and *BamHI*, cloned into the *I-SceI*-bearing pEMG vector digested with the same enzymes (giving rise to plasmid pEMG $\Delta glk$ ) and verified by enzyme restriction and Sanger DNA sequencing (Secugen SL, Madrid, Spain). The suicide pEMG $\Delta glk$  plasmid was transferred to *P. putida* KT2440 by electroporation. Kanamycin (Km)-resistant colonies (i.e., chromosomal co-integration events) were checked by colony PCR<sup>1</sup>. Successful co-integrates were transformed with plasmid pSW-I, which allows for the resolution of co-integration events by inducing the expression of the gene encoding the *I-SceI* homing meganuclease from *Saccharomyces cerevisiae* with sodium 3-methylbenzionate at 15 mM. The resultant Km-sensitive colonies were checked by PCR to select for the correct deletion events. Plasmid pSW-I was finally cured by successive passages on LB medium<sup>4</sup> without antibiotics. The removal of the plasmid was tested by plating the cells onto LB plates containing 500  $\mu\text{g ml}^{-1}$  ampicillin.

**Preparation of bacterial cell-free extracts.** All the enzyme activity determinations were carried out in cell-free extracts obtained from bacterial cells harvested during the mid-exponential phase of growth [i.e., corresponding to an optical density measured at 600 nm ( $\text{OD}_{600}$ ) of ca. 0.5] or, in some cases, after 24 h of culture. Cell-free extracts were prepared starting from 50 ml of culture broth and centrifuging it at 4,000 r.p.m. for 15 min at 4°C. Cells were washed twice with 25 ml of pre-cooled 67 mM potassium phosphate buffer (pH = 7.1) at 4°C. The washed pellets were suspended in 1 ml of the same buffer and centrifuging in 2-ml Eppendorf tubes at 8,000 r.p.m. for 10 min at 4°C. After carefully removing the supernatant, the cell wet weight was obtained for each pellet in order to calculate the volume of reagents needed for protein extraction using the Novagen BugBuster™ protocol (EMD Millipore Corp., Billerica, MA, USA). Pellets and cell-free extracts were kept on ice throughout the whole procedure. Bacterial lysis was achieved by using 5 ml of BugBuster™ Protein Extraction Reagent per gram of cell paste. Afterwards, 1  $\mu\text{l}$  of Lysonase™ Bioprocessing Reagent was added per 1 ml of BugBuster™ Protein Extraction Reagent used for re-suspension of the cells. Bacteria were lysed by shaking for 20 min at room temperature in a Rotamax 120 orbital shaker (Heidolph Instruments GmbH & Co. KG, Schwabach, Germany) at 150 r.p.m. The insoluble cell debris was removed by centrifugation at 13,000 r.p.m. for 20 min at 4°C and the supernatants (i.e., cell-free extracts) were stored at –20°C until use.

**In vitro enzymatic assays.** The activity of three key glycolytic enzymes (Gik, Pfk, and GA3P dehydrogenase) was assessed *in vitro* at 30°C when using cell-free extracts from *P. putida* or at 37°C when using cell-free extracts from *P. aeruginosa* and *Escherichia coli*, the remaining activities were measured at 25°C as indicated by Sigma-Aldrich Co. (St. Louis, MO, USA) in the corresponding enzymatic assay protocols. All the enzymes were assessed under the optimal reported conditions for pH, substrate, and cofactor concentration<sup>5-8</sup>.

*In vitro* assays were conducted in Nunc™ MicroWell™ 96-well microplates (Thermo Fisher Scientific Inc., Waltham, MA, USA) in a SpectraMax™ M2e multi-mode microplate reader (Molecular Devices LLC, Sunnyvale, CA, USA). All the specific enzyme activities are reported as nmol substrate converted min<sup>-1</sup> mg of protein<sup>-1</sup>.

The protein concentration in cell-free extracts was obtained using the Bradford<sup>9</sup> Protein Assay (Bio-Rad Laboratories Inc., Hercules, CA, USA). All the accessory enzymes (with the exceptions indicated below) were from *Saccharomyces cerevisiae* and they were purchased from Sigma-Aldrich Co. An extinction coefficient ( $\epsilon_{\text{NADP/H}}$ ) of 6.22 mM<sup>-1</sup> cm<sup>-1</sup>, representing the difference between the extinction coefficients of NAD(P)H and NAD(P)<sup>+</sup>, was used throughout. The specific protocols used for the determinations are detailed below.

**Gik.** *ATP-D-Hexose 6-phosphotransferase* or *hexokinase* (EC 2.7.1.1). The reaction mixture contained 67  $\mu\text{l}$  of 120 mM Tris·HCl buffer (pH = 8.2), 26  $\mu\text{l}$  of 500 mM glucose, 8  $\mu\text{l}$  of 250 mM MgCl<sub>2</sub>, 53  $\mu\text{l}$  of 36 mM ATP, 10  $\mu\text{l}$  of 20 mM NADP<sup>+</sup>, 13  $\mu\text{l}$  of glucose-6-*P* dehydrogenase (15 units ml<sup>-1</sup>), 18  $\mu\text{l}$  of water, and 5  $\mu\text{l}$  of cell-free extract (or an appropriate dilution in 67 mM potassium phosphate buffer, pH = 7.1). The increase in the absorbance at 340 nm ( $A_{340}$ ) was measured during the assay.

**Pgi.** *Phosphoglucose isomerase* (EC 5.3.1.9). The reaction mixture contained 33.3  $\mu\text{l}$  of 240 mM glycylglycine Buffer (pH = 7.1), 6.7  $\mu\text{l}$  of 100 mM D-fructose-6-*P*, 6.7  $\mu\text{l}$  of 20 mM NADP<sup>+</sup>, 6.7  $\mu\text{l}$  of 100 mM MgCl<sub>2</sub>, 6.7  $\mu\text{l}$  of glucose-6-*P* dehydrogenase (50 units ml<sup>-1</sup>), 133.2  $\mu\text{l}$  of water, and 6.7  $\mu\text{l}$  of cell-free extract (or an appropriate dilution in 67 mM potassium phosphate buffer, pH = 7.1). The increase in  $A_{340}$  was measured during the assay.

**Pfk.** *6-Phosphofructokinase* (EC 2.7.1.11). The reaction mixture contained 20  $\mu\text{l}$  of 1 M Tris·HCl buffer (pH = 7.5), 2  $\mu\text{l}$  of 100 mM fructose-6-*P*, 8  $\mu\text{l}$  of 250 mM MgCl<sub>2</sub>, 4  $\mu\text{l}$  of 100 mM NH<sub>4</sub>Cl, 4  $\mu\text{l}$  of 10 mM NADH, 6  $\mu\text{l}$  of 36 mM ATP, 4  $\mu\text{l}$  of fructose-1,6-*P*<sub>2</sub> aldolase (50 units ml<sup>-1</sup>), 1.5  $\mu\text{l}$  of triosephosphate isomerase (500 units ml<sup>-1</sup>), 1.5  $\mu\text{l}$  of glycerol-3-*P* dehydrogenase from rabbit muscle (170 units ml<sup>-1</sup>), 144  $\mu\text{l}$  of water, and 5  $\mu\text{l}$  of cell-free extract (or an appropriate dilution in 67 mM potassium phosphate buffer, pH = 7.1). The decrease in  $A_{340}$  was measured during the assay.

**Aldolase.** *Aldolase* (EC 4.1.2.13). The reaction mixture contained 17.3  $\mu\text{l}$  of 1 M Tris·HCl buffer (pH = 7.4), 6.7  $\mu\text{l}$  of 58 mM fructose-1,6-*P*<sub>2</sub>, 1.9  $\mu\text{l}$  of 14 mM NADH, 6.7  $\mu\text{l}$  of  $\alpha$ -glycerophosphate dehydrogenase/triosephosphate isomerase from rabbit muscle (50 units ml<sup>-1</sup> each), 165.4  $\mu\text{l}$  of water, and 2  $\mu\text{l}$  of cell-free extract (or an appropriate dilution in 67 mM potassium phosphate buffer, pH = 7.1). The decrease in  $A_{340}$  was measured during the assay.

**Tpi.** *Triose phosphate isomerase* (EC 5.3.1.1). The reaction mixture contained 20  $\mu\text{l}$  of 1 M triethanolamine buffer (pH = 7.9), 2  $\mu\text{l}$  of 0.5 M EDTA, 4  $\mu\text{l}$  of glycerol-3-*P* dehydrogenase from rabbit muscle (17 units ml<sup>-1</sup>), 2  $\mu\text{l}$  of 40 mM D,L-glyceraldehyde-3-*P*, 2  $\mu\text{l}$  of 14 mM NADH, 168  $\mu\text{l}$  of water, and 2  $\mu\text{l}$  of cell-free extract (or an appropriate dilution in 67 mM potassium phosphate buffer, pH = 7.1). The decrease in  $A_{340}$  was measured during the assay.

**GA3P dehydrogenase.** *Glyceraldehyde-3-P dehydrogenase* [EC 1.2.1.12 (NAD<sup>+</sup> dependent)/EC 1.2.1.13 NADP<sup>+</sup> dependent]. The reaction mixture contained 20  $\mu$ l of 1 M Tris·HCl buffer (pH = 7.5), 5  $\mu$ l of 250 mM D,L-glyceraldehyde-3-P, 40  $\mu$ l of 50 mM cysteine·HCl, 20  $\mu$ l of 150 mM NaH<sub>2</sub>AsO<sub>4</sub>, 34  $\mu$ l of 120 mM NaF, 20  $\mu$ l of 35 mM NAD<sup>+</sup> or NADP<sup>+</sup>, 56  $\mu$ l of water, and 5  $\mu$ l of cell-free extract (or an appropriate dilution in 67 mM potassium phosphate buffer, pH = 7.1). The increase in  $A_{340}$  was measured during the assay.

---

**SUPPLEMENTARY TABLES**

---

**Table S1.** Bacterial strains used in this study.

| Strain                           | Relevant characteristics <sup>a</sup>                                                                                                                                                                                                                                                                                                                                        | Reference or source                           |
|----------------------------------|------------------------------------------------------------------------------------------------------------------------------------------------------------------------------------------------------------------------------------------------------------------------------------------------------------------------------------------------------------------------------|-----------------------------------------------|
| <i>Escherichia coli</i>          |                                                                                                                                                                                                                                                                                                                                                                              |                                               |
| CC118                            | Cloning host; $\Delta(\text{ara-leu})$ <i>araD</i> $\Delta\text{lacX174}$ <i>galE</i> <i>galk</i> <i>phoA</i> <i>thiE1</i> <i>rpsE</i> <i>rpoB</i> (Rif <sup>R</sup> ) <i>argE</i> (Am) <i>recA1</i>                                                                                                                                                                         | Manoil and Beckwith <sup>10</sup>             |
| DH5 $\alpha$ $\lambda\text{pir}$ | Cloning host; F <sup>-</sup> $\lambda^-$ <i>endA1</i> <i>glnX44</i> (AS) <i>thiE1</i> <i>recA1</i> <i>relA1</i> <i>spoT1</i> <i>gyrA96</i> (Nal <sup>R</sup> ) <i>rfbC1</i> <i>deoR</i> <i>nupG</i> $\Phi 80(\text{lacZ}\Delta\text{M15})$ $\Delta(\text{argF-lac})\text{U169}$ <i>hsdR17</i> ( <i>rK</i> <sup>-</sup> <i>mK</i> <sup>+</sup> ), $\lambda\text{pir}$ lysogen | Hanahan and Meselson <sup>11</sup>            |
| BW25113 <sup>b</sup>             | Wild-type strain; F <sup>-</sup> $\lambda^-$ $\Delta(\text{araD-araB})567$ $\Delta\text{lacZ4787}(\text{:}::\text{rmB-3})$ <i>rph-1</i> $\Delta(\text{rhaD-rhaB})568$ <i>hsdR514</i>                                                                                                                                                                                         | Datsenko and Wanner <sup>12</sup>             |
| JW3887-1 <sup>b</sup>            | Same as BW25113, but $\Delta\text{pfkA775}::\text{aphA}$ ; Km <sup>R</sup>                                                                                                                                                                                                                                                                                                   | Baba <i>et al.</i> <sup>13</sup>              |
| JW5280-1 <sup>b</sup>            | Same as BW25113, but $\Delta\text{pfkB722}::\text{aphA}$ ; Km <sup>R</sup>                                                                                                                                                                                                                                                                                                   | Baba <i>et al.</i> <sup>13</sup>              |
| BPfkAB                           | Same as BW25113, but $\Delta\text{pfkA775}::\text{FRT}$ $\Delta\text{pfkB722}::\text{aphA}$ ; Km <sup>R</sup>                                                                                                                                                                                                                                                                | This study                                    |
| JW2385-1 <sup>b</sup>            | Same as BW25113, but $\Delta\text{glk-726}::\text{aphA}$ ; Km <sup>R</sup>                                                                                                                                                                                                                                                                                                   | Baba <i>et al.</i> <sup>13</sup>              |
| JW2409-1 <sup>b</sup>            | Same as BW25113, but $\Delta\text{ptsI745}::\text{aphA}$ ; Km <sup>R</sup>                                                                                                                                                                                                                                                                                                   | Baba <i>et al.</i> <sup>13</sup>              |
| BPG                              | Same as BW25113, but $\Delta\text{glk-726}::\text{FRT}$ $\Delta\text{ptsI745}::\text{aphA}$ ; Km <sup>R</sup>                                                                                                                                                                                                                                                                | Nikel and de Lorenzo <sup>2</sup>             |
| JW3890-2 <sup>b</sup>            | Same as BW25113, but $\Delta\text{tpiA778}::\text{aphA}$ ; Km <sup>R</sup>                                                                                                                                                                                                                                                                                                   | Baba <i>et al.</i> <sup>13</sup>              |
| W3110                            | Wild-type strain; F <sup>-</sup> $\lambda^-$ <i>IN(rrnD-rrnE)1</i> <i>rph-1</i>                                                                                                                                                                                                                                                                                              | Jensen <sup>14</sup> , Bachmann <sup>15</sup> |
| DS121 <sup>b</sup>               | Same as W3110, but $\Delta\text{epd-11}::\text{erm}$ ; Ery <sup>R</sup>                                                                                                                                                                                                                                                                                                      | Seta <i>et al.</i> <sup>16</sup>              |
| DS122 <sup>b</sup>               | Same as W3110, but $\Delta\text{gapA12}::\text{cat}$ ; Cm <sup>R</sup>                                                                                                                                                                                                                                                                                                       | Seta <i>et al.</i> <sup>16</sup>              |
| DS123 <sup>b</sup>               | Same as W3110, but $\Delta\text{gapA12}::\text{cat}$ $\Delta\text{epd-11}::\text{erm}$ ; Cm <sup>R</sup> Ery <sup>R</sup>                                                                                                                                                                                                                                                    | Seta <i>et al.</i> <sup>16</sup>              |
| DS123PK                          | Same as W3110, but $\Delta\text{gapA12}::\text{cat}$ $\Delta\text{epd-11}::\text{erm}$ $\Delta\text{ptsI745}::\text{aphA}$ ; Cm <sup>R</sup> Ery <sup>R</sup> Km <sup>R</sup>                                                                                                                                                                                                | This study                                    |
| DS123P                           | Same as W3110, but $\Delta\text{gapA12}::\text{cat}$ $\Delta\text{epd-11}::\text{erm}$ $\Delta\text{ptsI745}::\text{FRT}$ ; Cm <sup>R</sup> Ery <sup>R</sup>                                                                                                                                                                                                                 | This study                                    |
| DF575 <sup>b</sup>               | F <sup>-</sup> $\lambda^-$ <i>glnX44</i> (AS) <i>relA1</i> <i>eno-2</i> <i>rpsL104</i> <i>malA</i> <i>malT1</i> ( $\lambda^R$ ) <i>xyl-7</i> <i>mtlA2</i> <i>thiE1</i>                                                                                                                                                                                                       | Thomson <i>et al.</i> <sup>17</sup>           |
| DF576 <sup>b</sup>               | F <sup>-</sup> $\lambda^-$ <i>glnX44</i> (AS) <i>relA1</i> <i>pgk-2</i> <i>rpsL104</i> <i>malA</i> <i>malT1</i> ( $\lambda^R$ ) <i>xyl-7</i> <i>mtlA2</i> <i>thiE1</i>                                                                                                                                                                                                       | Thomson <i>et al.</i> <sup>17</sup>           |

---

**Table S1 (cont.).** Bacterial strains used in this study.

| Strain                        | Relevant characteristics <sup>a</sup>                                                            | Reference or source                     |
|-------------------------------|--------------------------------------------------------------------------------------------------|-----------------------------------------|
| <i>Pseudomonas putida</i>     |                                                                                                  |                                         |
| KT2440                        | Wild-type strain, derived from <i>P. putida</i> mt-2 <sup>18</sup> cured of the TOL plasmid pWW0 | Bagdasarian <i>et al.</i> <sup>19</sup> |
| KT2440 $\Delta glk$           | Same as KT2440, but with an in-frame deletion of the <i>glk</i> gene ( <i>PP_1011</i> )          | This study                              |
| <i>Pseudomonas aeruginosa</i> |                                                                                                  |                                         |
| PAO1                          | Wild-type strain (PAO1001), original stock conserved by P. V. Phibbs                             | Stover <i>et al.</i> <sup>20</sup>      |

<sup>a</sup> Antibiotic markers: *Ap*, ampicillin; *Cm*, chloramphenicol; *Ery*, erythromycin; *Gm*, gentamicin; *Km*, kanamycin; *Nal*, nalidixic acid; *Rif*, rifampicin; *Sm*, streptomycin; *Sp*, spectinomycin; and *Tc*, tetracycline.

<sup>b</sup> Strain obtained from the *E. coli* Genetic Stock Center (Yale University, New Haven, CT, USA).

**Table S2.** Plasmids used in this study.

| Plasmids                 | Relevant characteristics <sup>a</sup>                                                                                                                                                                                                  | Reference or source                         |
|--------------------------|----------------------------------------------------------------------------------------------------------------------------------------------------------------------------------------------------------------------------------------|---------------------------------------------|
| pKD46                    | Ap <sup>R</sup> ; helper plasmid expressing the $\lambda$ -Red recombination functions                                                                                                                                                 | Datsenko and Wanner <sup>12</sup>           |
| pCP20                    | Ap <sup>R</sup> Cm <sup>R</sup> ; helper plasmid used for excision of <i>FRT-aphA-FRT</i> (Km <sup>R</sup> ), <i>Saccharomyces cerevisiae</i> <i>FLP</i> $\lambda$ cl857 $\lambda$ P <sub>R</sub> <i>repA</i> (Ts)                     | Cherepanov and Wachernagel <sup>21</sup>    |
| pEMG                     | Km <sup>R</sup> ; <i>oriV</i> (R6K), vector used for deletions, <i>lacZ</i> $\alpha$ with two flanking I-SceI target sites                                                                                                             | Martínez-García and de Lorenzo <sup>1</sup> |
| pEMG $\Delta$ <i>glk</i> | Km <sup>R</sup> ; pEMG derivative bearing a 1.0-kb TS1-TS2 <i>EcoRI</i> - <i>Bam</i> HI insert for deletion of the <i>glk</i> gene of <i>P. putida</i> KT2440                                                                          | This study                                  |
| pSW-I <sup>b</sup>       | Ap <sup>R</sup> ; <i>oriV</i> (RK2), <i>xyIS</i> , <i>Pm</i> →I-SceI, transcriptional fusion of the gene encoding I-SceI to the <i>Pm</i> promoter                                                                                     | Wong and Mekalanos <sup>22</sup>            |
| pAeT41                   | Ap <sup>R</sup> ; derivative of cloning vector pUC18 (Thermo Fisher Scientific Inc.; Pittsburgh, PA, USA) bearing a ca. 5-kb <i>Small/EcoRI</i> DNA fragment spanning the <i>phaC1AB1</i> gene cluster from <i>Cupriavidus necator</i> | Peoples and Sinskey <sup>23</sup>           |
| pSEVA224                 | Km <sup>R</sup> ; standard SEVA expression vector, <i>oriV</i> (RK2) <i>lacI</i> <sup>Q</sup> , <i>P</i> <sub>trc</sub>                                                                                                                | Silva-Rocha <i>et al.</i> <sup>24</sup>     |
| pS224·GPG                | Km <sup>R</sup> ; pSEVA224 derivative bearing <i>glk</i> and <i>pfkA</i> from Module I, and <i>gapA</i> from Module II                                                                                                                 | This study                                  |
| pS224·GBI                | Km <sup>R</sup> ; pSEVA224 derivative bearing Module I as an <i>AvrII</i> - <i>Bam</i> HI insert                                                                                                                                       | This study                                  |
| pS224·GBII               | Km <sup>R</sup> ; pSEVA224 derivative bearing Module II as a <i>Bam</i> HI- <i>Hind</i> III insert                                                                                                                                     | This study                                  |
| pSEVA234                 | Km <sup>R</sup> ; standard SEVA expression vector, <i>oriV</i> (pBBR1) <i>lacI</i> <sup>Q</sup> , <i>P</i> <sub>trc</sub>                                                                                                              | Silva-Rocha <i>et al.</i> <sup>24</sup>     |
| pS234·GBI                | Km <sup>R</sup> ; pSEVA234 derivative bearing Module I as an <i>AvrII</i> - <i>Bam</i> HI insert                                                                                                                                       | This study                                  |
| pSEVA434                 | Sm <sup>R</sup> /Sp <sup>R</sup> ; standard SEVA expression vector, <i>oriV</i> (pBBR1) <i>lacI</i> <sup>Q</sup> , <i>P</i> <sub>trc</sub>                                                                                             | Silva-Rocha <i>et al.</i> <sup>24</sup>     |
| pS434·GBI                | Sm <sup>R</sup> /Sp <sup>R</sup> ; pSEVA434 derivative bearing Module I as an <i>AvrII</i> - <i>Bam</i> HI insert                                                                                                                      | This study                                  |
| pSEVA424                 | Sm <sup>R</sup> /Sp <sup>R</sup> ; standard SEVA expression vector, <i>oriV</i> (RK2) <i>lacI</i> <sup>Q</sup> , <i>P</i> <sub>trc</sub>                                                                                               | This study                                  |
| pS424· <i>gapA</i>       | Sm <sup>R</sup> /Sp <sup>R</sup> ; pSEVA424 bearing <i>gapA</i> from Module II                                                                                                                                                         | This study                                  |
| pS424·GBI                | Sm <sup>R</sup> /Sp <sup>R</sup> ; pSEVA424 derivative bearing Module I as an <i>AvrII</i> - <i>Bam</i> HI insert                                                                                                                      | This study                                  |
| pSEVA438                 | Sm <sup>R</sup> /Sp <sup>R</sup> ; standard SEVA expression vector, <i>oriV</i> (pBBR1) <i>xyIS</i> , <i>Pm</i>                                                                                                                        | This study                                  |
| pS438·GBI                | Sm <sup>R</sup> /Sp <sup>R</sup> ; pSEVA438 derivative bearing Module I as an <i>AvrII</i> - <i>Bam</i> HI insert                                                                                                                      | This study                                  |

<sup>a</sup> Antibiotic markers: *Ap*, ampicillin; *Cm*, chloramphenicol; *Km*, kanamycin; *Sm*, streptomycin; and *Sp*, spectinomycin. Ts, temperature-sensitive origin of replication.

<sup>b</sup> This plasmid is the same as pSW(I-SceI)<sup>22</sup>, renamed here as pSW-I for simplicity.

**Table S3.** Oligonucleotides used in this study.

| Name                      | Sequence (5' → 3') <sup>a</sup>                                                       | T <sub>m</sub> (°C) | Use                                                                                          |
|---------------------------|---------------------------------------------------------------------------------------|---------------------|----------------------------------------------------------------------------------------------|
| <i>PP_1011</i> -TS1F      | <b>GGA ATT CGA</b> GGC CCC GGC GCG GGT<br>GTT CCA GGA CCA G                           | 89.2                |                                                                                              |
| <i>PP_1011</i> -TS1R      | CAT CGG GGC CGC AAA GCG CCC CCC<br>TCA GTG GTG CTT CAT TTG AGG TGC<br>TCC AGG GCC GAG | 91.5                | Construction of<br><i>P. putida</i> Δ <i>glk</i>                                             |
| <i>PP_1011</i> -TS2F      | CAC TGA GGG GGG CGC TTT GCG GCC<br>CCG ATG                                            | 86.5                |                                                                                              |
| <i>PP_1011</i> -TS2R      | <b>CGG GAT CCC</b> GCC AGT CGT CGA AGG<br>CCA GCA CGG CGT TG                          | 91.2                |                                                                                              |
| <i>pfkA·fbaA</i> -Check-F | GAA AGG TAA AAA ACA CGC GAT C                                                         | 58.7                |                                                                                              |
| <i>pfkA·fbaA</i> -Check-R | ACG CTG CGA TGG TGA AAC                                                               | 59.2                |                                                                                              |
| <i>gpmA·eno</i> -Check-F  | ATT CTG CCG CGT ATG AAG AG                                                            | 58.9                | Screening of<br>recombinants<br>carrying Module II <sup>c</sup>                              |
| <i>gpmA·eno</i> -Check-R  | CAG AGC TTC AGC GTT GGA AC                                                            | 59.6                |                                                                                              |
| <i>phaC1</i> -Check-F     | GCC ACT GGA CTA ACG ATG CGC TG                                                        | 68.7                | Screening of<br>recombinants<br>carrying the<br><i>phaC1AB1</i> gene<br>cluster <sup>d</sup> |
| <i>phaA</i> -Check-F      | TCA CCG TGC CGG CCT TGT C                                                             | 68.6                |                                                                                              |

<sup>a</sup> Bold letters indicate recognition site for the restriction enzymes and the complementary sequences used in splicing-by-overlap extension (SOEing<sup>2,3</sup>) PCR amplifications are shown in italics.

<sup>b</sup> A PCR amplification using these oligonucleotides yields a 1,015-bp amplicon in the junction of the *pfkA* and *fbaA* genes.

<sup>c</sup> A PCR amplification using these oligonucleotides yields a 938-bp amplicon in the junction of the *gpmA* and *eno* genes.

<sup>d</sup> A PCR amplification using these oligonucleotides yields a 1,017-bp amplicon in the junction of the *phaC1* and *phaA* genes.

## REFERENCES

---

- (1) Martínez-García, E., and de Lorenzo, V. (2011) Engineering multiple genomic deletions in Gram-negative bacteria: analysis of the multi-resistant antibiotic profile of *Pseudomonas putida* KT2440, *Environ. Microbiol.* 13, 2702-2716.
- (2) Nikel, P. I., and de Lorenzo, V. (2013) Implantation of unmarked regulatory and metabolic modules in Gram-negative bacteria with specialised mini-transposon delivery vectors, *J. Biotechnol.* 163, 143-154.
- (3) Horton, R. M. (1995) PCR-mediated recombination and mutagenesis: *SOEing* together tailor-made genes, *Mol. Biotechnol.* 3, 93-99.
- (4) Green, M. R., and Sambrook, J. (2012) *Molecular cloning: a laboratory manual*, 4th ed., Cold Spring Harbor Laboratory Press, Cold Spring Harbor, NY.
- (5) Nikel, P. I., Chavarría, M., Fuhrer, T., Sauer, U., and de Lorenzo, V. (2015) *Pseudomonas putida* KT2440 strain metabolizes glucose through a cycle formed by enzymes of the Entner-Doudoroff, Embden-Meyerhof-Parnas, and pentose phosphate pathways, *J. Biol. Chem.* 290, 25920-25932.
- (6) Nikel, P. I., Kim, J., and de Lorenzo, V. (2014) Metabolic and regulatory rearrangements underlying glycerol metabolism in *Pseudomonas putida* KT2440, *Environ. Microbiol.* 16, 239-254.
- (7) Chavarría, M., Nikel, P. I., Pérez-Pantoja, D., and de Lorenzo, V. (2013) The Entner-Doudoroff pathway empowers *Pseudomonas putida* KT2440 with a high tolerance to oxidative stress, *Environ. Microbiol.* 15, 1772-1785.
- (8) Nikel, P. I., and Chavarría, M. (2016) Quantitative physiology approaches to understand and optimize reducing power availability in environmental bacteria, In *Hydrocarbon and Lipid Microbiology Protocols—Synthetic and Systems Biology - Tools* (McGenity, T. J., Timmis, K. N., and Nogales-Fernández, B., Eds.), pp 39-70, Humana Press, Heidelberg, Germany.
- (9) Bradford, M. M. (1976) A rapid and sensitive method for the quantitation of microgram quantities of protein utilizing the principle of protein-dye binding, *Anal. Biochem.* 72, 248-254.
- (10) Manoil, C., and Beckwith, J. (1985) *TnphoA*: a transposon probe for protein export signals, *Proc. Natl. Acad. Sci. USA* 82, 8129-8133.
- (11) Hanahan, D., and Meselson, M. (1983) Plasmid screening at high colony density, *Methods Enzymol.* 100, 333-342.
- (12) Datsenko, K. A., and Wanner, B. L. (2000) One-step inactivation of chromosomal genes in *Escherichia coli* K-12 using PCR products, *Proc. Natl. Acad. Sci. USA* 97, 6640-6645.
- (13) Baba, T., Ara, T., Hasegawa, M., Takai, Y., Okumura, Y., Baba, M., Datsenko, K. A., Tomita, M., Wanner, B. L., and Mori, H. (2006) Construction of *Escherichia coli* K-12 in-frame, single-gene knockout mutants: the Keio collection, *Mol. Syst. Biol.* 2, 2006.0008.
- (14) Jensen, K. F. (1993) The *Escherichia coli* K-12 "wild types" W3110 and MG1655 have an *rph* frameshift mutation that leads to pyrimidine starvation due to low *pyrE* expression levels, *J. Bacteriol.* 175, 3401-3407.
- (15) Bachmann, B. J. (1972) Pedigrees of some mutant strains of *Escherichia coli* K-12, *Bacteriol. Rev.* 36, 525-557.
- (16) Seta, F. D., Boschi-Muller, S., Vignais, M. L., and Branlant, G. (1997) Characterization of *Escherichia coli* strains with *gapA* and *gapB* genes deleted, *J. Bacteriol.* 179, 5218-5221.
- (17) Thomson, J., Gerstenberger, P. D., Goldberg, D. E., Gociar, E., Orozco de Silva, A., and Fraenkel, D. G. (1979) ColE1 hybrid plasmids for *Escherichia coli* genes of glycolysis and the hexose monophosphate shunt, *J. Bacteriol.* 137, 502-506.
- (18) Worsey, M. J., and Williams, P. A. (1975) Metabolism of toluene and xylenes by *Pseudomonas putida* (arvilla) mt-2: evidence for a new function of the TOL plasmid, *J. Bacteriol.* 124, 7-13.



- (19) Bagdasarian, M., Lurz, R., Rückert, B., Franklin, F. C. H., Bagdasarian, M. M., Frey, J., and Timmis, K. N. (1981) Specific purpose plasmid cloning vectors. II. Broad host range, high copy number, RSF1010-derived vectors, and a host-vector system for gene cloning in *Pseudomonas*, *Gene* 16, 237-247.
- (20) Stover, C. K., Pham, X. Q., Erwin, A. L., Mizoguchi, S. D., Warrener, P., Hickey, M. J., Brinkman, F. S. L., Hufnagle, W. O., Kowalik, D. J., Lagrou, M., Garber, R. L., Goltry, L., Tolentino, E., Westbrook-Wadman, S., Yuan, Y., Brody, L. L., Coulter, S. N., Folger, K. R., Kas, A., Larbig, K., Lim, R., Smith, K., Spencer, D., Wong, G. K. S., Wu, Z., Paulsen, I. T., Reizer, J., Saier, M. H., Hancock, R. E. W., Lory, S., and Olson, M. V. (2000) Complete genome sequence of *Pseudomonas aeruginosa* PAO1, an opportunistic pathogen, *Nature* 406, 959-964.
- (21) Cherepanov, P. P., and Wackernagel, W. (1995) Gene disruption in *Escherichia coli*: Tc<sup>R</sup> and Km<sup>R</sup> cassettes with the option of Flp-catalyzed excision of the antibiotic-resistance determinant, *Gene* 158, 9-14.
- (22) Wong, S. M., and Mekalanos, J. J. (2000) Genetic footprinting with *mariner*-based transposition in *Pseudomonas aeruginosa*, *Proc. Natl. Acad. Sci. USA* 97, 10191-10196.
- (23) Peoples, O. P., and Sinskey, A. J. (1989) Poly- $\beta$ -hydroxybutyrate (PHB) biosynthesis in *Alcaligenes eutrophus* H16. Identification and characterization of the PHB polymerase gene (*phbC*), *J. Biol. Chem.* 264, 15298-15303.
- (24) Silva-Rocha, R., Martínez-García, E., Calles, B., Chavarría, M., Arce-Rodríguez, A., de las Heras, A., Páez-Espino, A. D., Durante-Rodríguez, G., Kim, J., Nickel, P. I., Platero, R., and de Lorenzo, V. (2013) The Standard European Vector Architecture (SEVA): a coherent platform for the analysis and deployment of complex prokaryotic phenotypes, *Nucleic Acids Res.* 41, D666-D675.
